# Supplementary material for: Efficient batch and column removal of Cr(vi) by carbon beads with developed nano-network
Source: Royal Society of Chemistry journal article supplement (doi:10.1039/c6ra14070j), 2016-01-01
Supplement: c6ra14070j1.pdf [file c6ra14070j1.pdf]

*Electronic Supporting Information (ESI) for*

**Towards efficient batch and column removal of Cr(VI) by  
carbon beads with developed nano-network**

Wei Zheng, Qingda An\*, Zhimin Lei, Zuoyi Xiao, Shangru Zhai\*, Qiumei Liu  
Faculty of Light Industry and Chemical Engineering, Dalian Polytechnic University,  
Dalian 116034, China

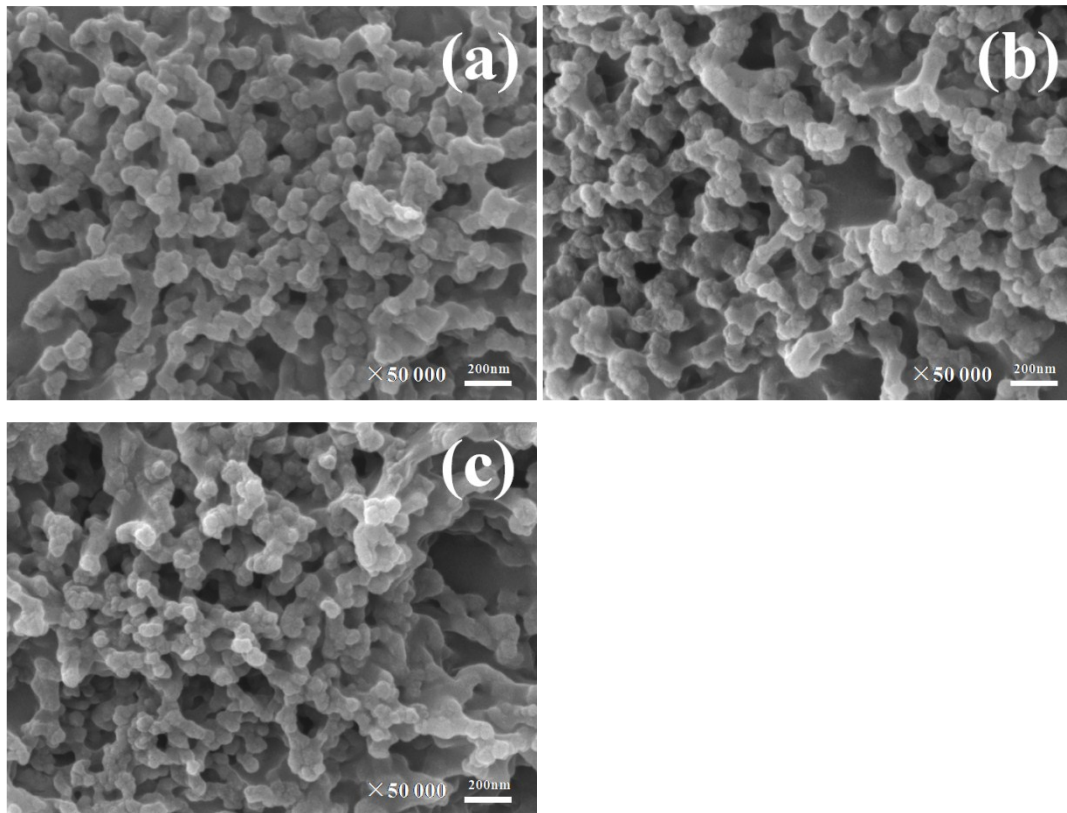

**Fig. S1.** FESEM images of the precursor (a), Alg-CB(b) and Alg-CB-Cr(c).

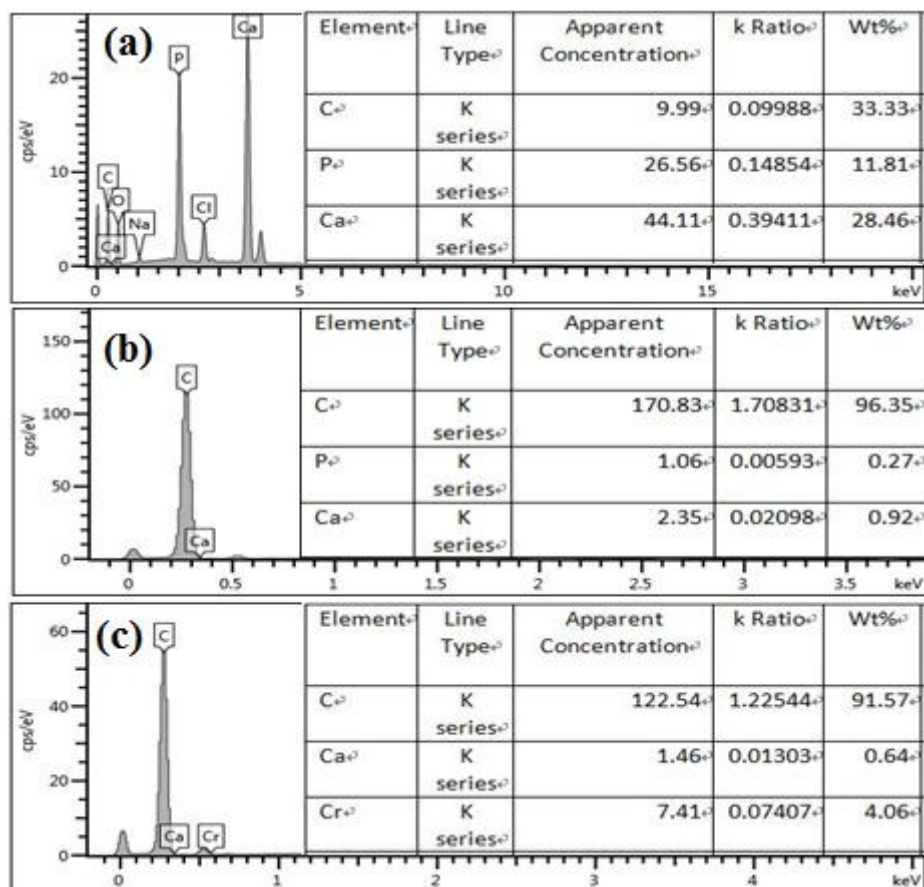

**Fig. S2.** EDS spectra of the precursor (a), Alg-CB (b) and Alg-CB-Cr (c).

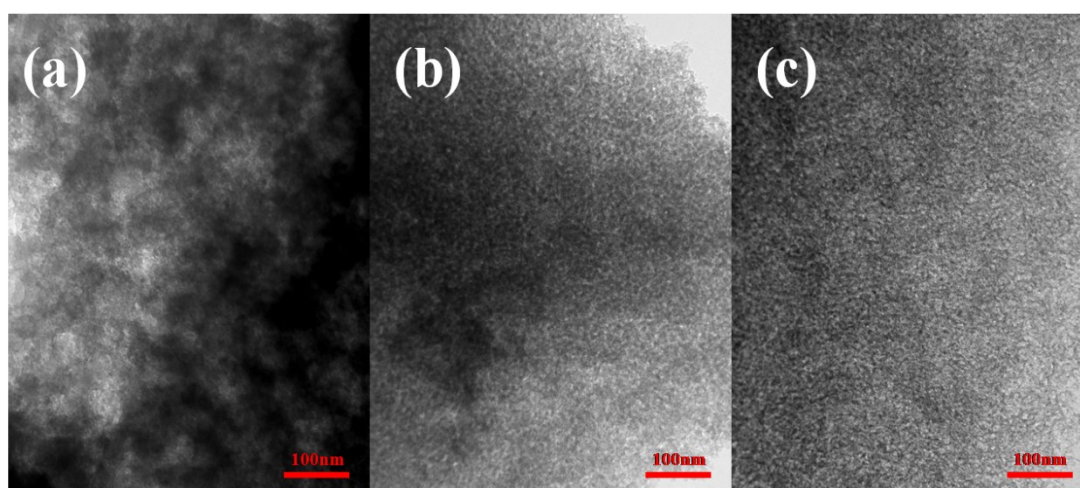

**Fig. S3.** TEM images of Alg-CB-400(a), Alg-CB-600(b) and Alg-CB-800(c).

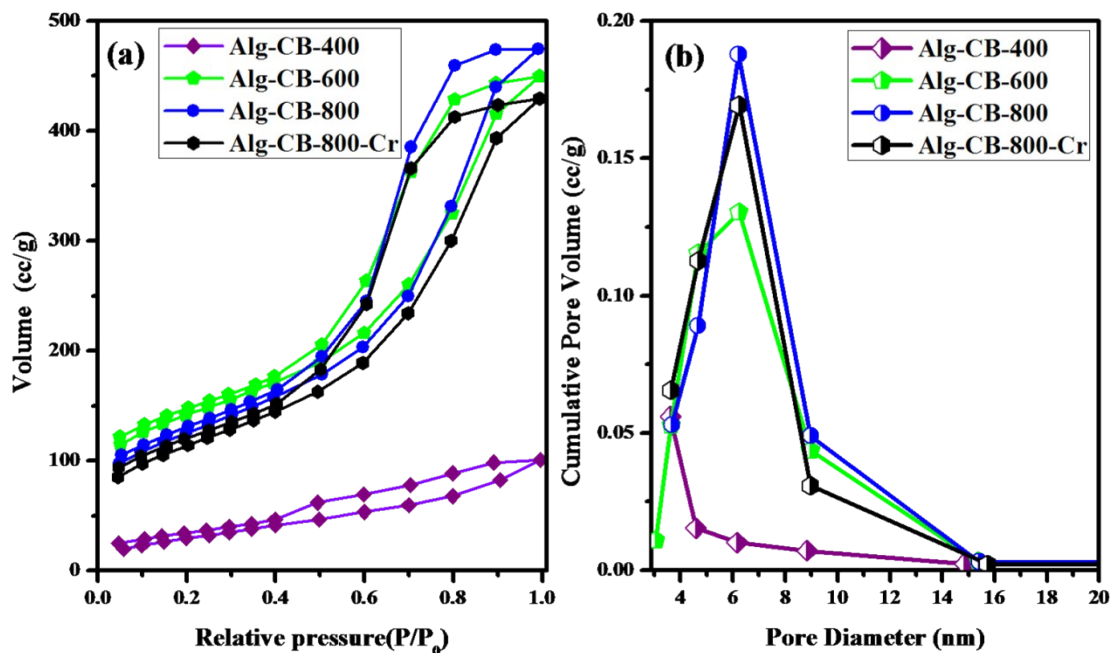

Fig. S4. N<sub>2</sub> adsorption-desorption isotherms (a) and the pore distribution (b) of Alg-CB-X and Alg-CB-800-Cr.

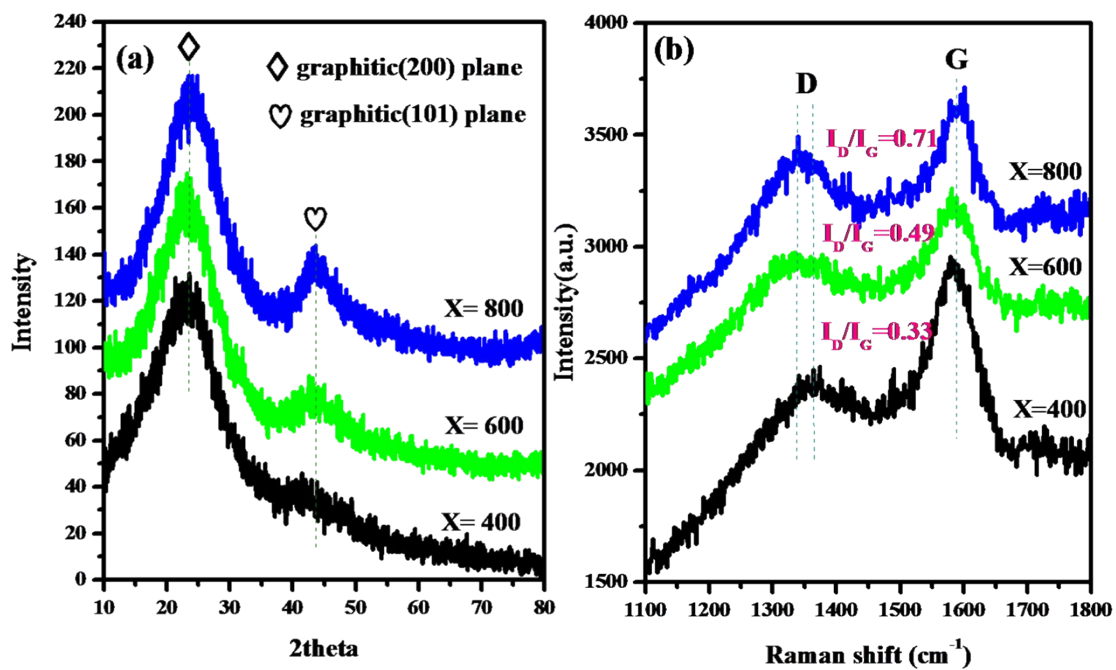

Fig. S5. XRD patterns (a) and Raman spectrum (b) of Alg-CB-X.

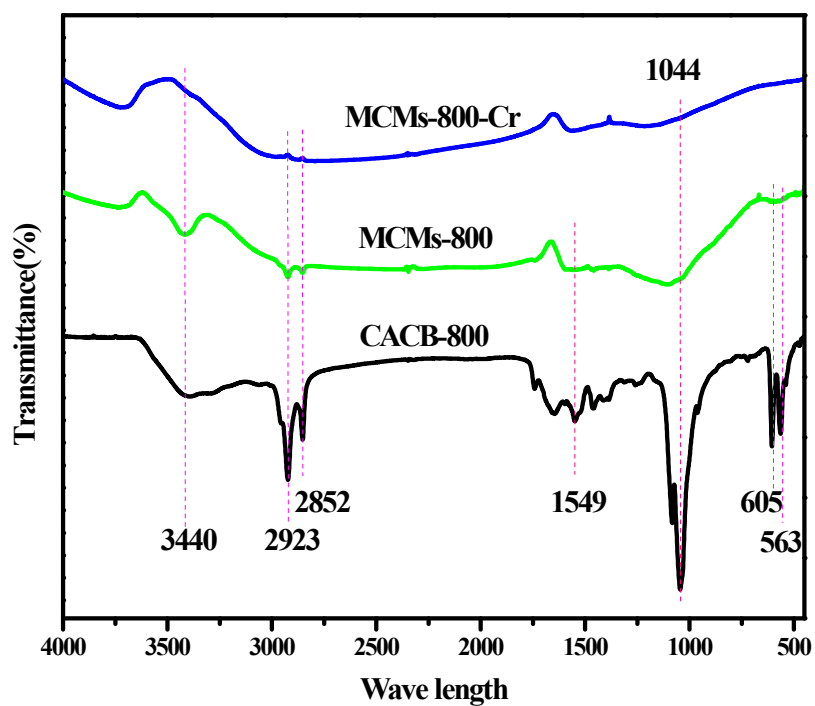

**Fig. S6.** FTIR spectra of the precursor, Alg-CB-800 and Alg-CB-800-Cr.

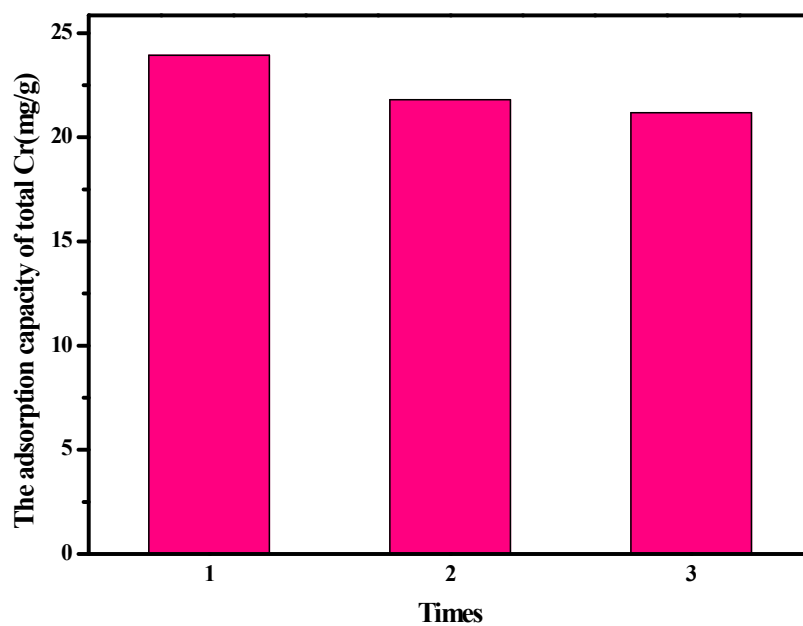

**Fig. S7.** The reusability of Alg-CB-800 removed the total Cr (initial Cr (VI) concentration, 25 mg L<sup>-1</sup>; pH, 3.0; contact time, 4 h and temperature, 293± 2K).

**Table S1.** The BET parameters of the Alg-CB-X and Alg-CB-800-Cr.

| Sample      | $S_{\text{BET}}(\text{m}^2 \text{g}^{-1})$ | $V_{\text{total}}(\text{cc g}^{-1})$ | $D_{\text{average}}(\text{\AA})$ |
|-------------|--------------------------------------------|--------------------------------------|----------------------------------|
| MCMs-400    | $112.2 \pm 0.4$                            | $0.16 \pm 0.01$                      | $54.9 \pm 0.1$                   |
| MCMs-600    | $410.5 \pm 2.1$                            | $0.70 \pm 0.013$                     | $55.5 \pm 0.1$                   |
| MCMs-800    | $444.0 \pm 2.8$                            | $0.73 \pm 0.02$                      | $66.1 \pm 0.2$                   |
| MCMs-800-Cr | $405.2 \pm 2.3$                            | $0.66 \pm 0.01$                      | $65.6 \pm 0.1$                   |

**Table S2** The Cr(VI) removal capacity of Fe-SA-800 compared with other similar materials

| Adsorbent                             | Batch<br>Adsorption<br>Capacity( $\text{mg g}^{-1}$ ) | pH  | Column<br>Adsorption<br>Capacity( $\text{mg g}^{-1}$ ) | Reference |
|---------------------------------------|-------------------------------------------------------|-----|--------------------------------------------------------|-----------|
| Porous Titania Bead                   | 8.90                                                  | 2   | \                                                      | 29        |
| $\text{Fe}_3\text{O}_4@\text{Alg-Ce}$ | 14.29                                                 | 5   | \                                                      | 30        |
| Alg-MMT/PANI                          | 29.89                                                 | 2   | \                                                      | 31        |
| Fe-SA-800                             | 86.32                                                 | 2   | \                                                      | 42        |
| IL- oxi-MWCNTs                        | 85.83                                                 | 2.8 | \                                                      | 56        |
| Alg-CB-800                            | $50.4 \pm 0.4$                                        | 3   | $45.2 \pm 0.4$                                         | This work |
